# Supplementary material for: Associations of healthy lifestyles with cerebrospinal fluid biomarkers of Alzheimer’s disease pathology in cognitively intact older adults: the CABLE study
Source: PubMed Central journal article supplement (PMC8056495; doi:10.1186/s13195-021-00822-7), 2021-04-19
Supplement: 13195_2021_822_MOESM1_ESM.pdf [file 13195_2021_822_MOESM1_ESM.pdf]

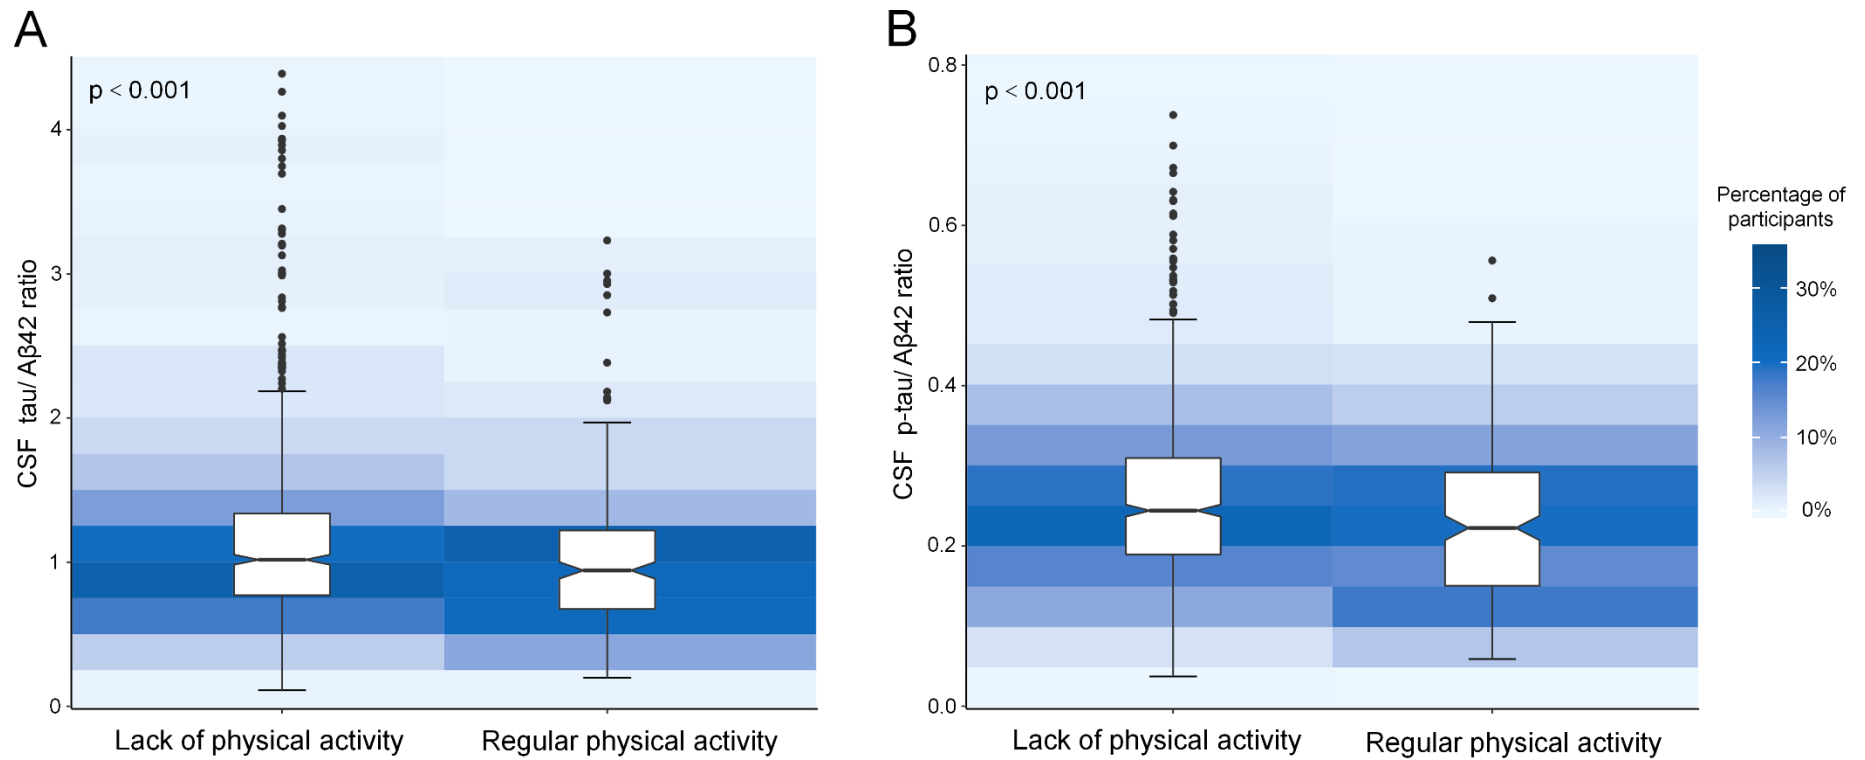

**Supplementary Fig.1. Associations of physical activity with CSF tau/A $\beta$ 42 and p-tau/ A $\beta$ 42 ratios.**

(A) Participants who were physically active had lower CSF tau/A $\beta$ 42 compared to those who had a lack of physical activity ( $p=0.006$ ). (B)

Participants who were physically active had lower p-tau/A $\beta$ 42 levels compared to those who had a lack of physical activity ( $p < 0.001$ ).

**Supplementary Table 1. Association between lifestyle categories and CSF AD biomarkers**

|                                | CSF A $\beta$ 42 |          |                    | CSF tau   |                 |                    | CSF p-tau |                 |                    |
|--------------------------------|------------------|----------|--------------------|-----------|-----------------|--------------------|-----------|-----------------|--------------------|
|                                | $\beta$          | <i>p</i> | <i>p</i> for trend | $\beta$   | <i>p</i>        | <i>p</i> for trend | $\beta$   | <i>p</i>        | <i>p</i> for trend |
| All participants               |                  |          | 0.39               |           |                 | <b>&lt;0.01</b>    |           |                 | <b>&lt;0.01</b>    |
| Unfavorable lifestyle          | Reference        | -        |                    | Reference | -               |                    | Reference | -               |                    |
| Intermediate lifestyle         | -0.0003          | 0.10     |                    | -0.0048   | <b>0.02</b>     |                    | -0.0055   | <b>0.05</b>     |                    |
| Favorable lifestyle            | 0.0003           | 0.16     |                    | -0.0120   | <b>&lt;0.01</b> |                    | -0.0150   | <b>&lt;0.01</b> |                    |
| APOE $\epsilon$ 4 carriers     |                  |          | 0.96               |           |                 | <b>&lt;0.01</b>    |           |                 | <b>0.02</b>        |
| Unfavorable lifestyle          | Reference        | -        |                    | Reference | -               |                    | Reference | -               |                    |
| Intermediate lifestyle         | -0.0004          | 0.32     |                    | -0.0156   | <b>&lt;0.01</b> |                    | -0.0129   | 0.06            |                    |
| Favorable lifestyle            | 0.0001           | 0.92     |                    | -0.0182   | <b>&lt;0.01</b> |                    | -0.0214   | <b>0.03</b>     |                    |
| APOE $\epsilon$ 4 non-carriers |                  |          | 0.48               |           |                 | <b>&lt;0.01</b>    |           |                 | <b>&lt;0.01</b>    |
| Unfavorable lifestyle          | Reference        | -        |                    | Reference | -               |                    | Reference | -               |                    |
| Intermediate lifestyle         | -0.0002          | 0.18     |                    | -0.0026   | 0.27            |                    | -0.0043   | 0.15            |                    |
| Favorable lifestyle            | 0.0004           | 0.14     |                    | -0.0107   | <b>&lt;0.01</b> |                    | -0.0137   | <b>&lt;0.01</b> |                    |

**Supplementary Table 2. Association of lifestyle categories with CSF A $\beta$ 42/A $\beta$ 40, tau/A $\beta$ 42 and p-tau/A $\beta$ 42 ratios**

|                                | CSF A $\beta$ 42/A $\beta$ 40 |          |                    | CSF tau/A $\beta$ 42 |                 |                    | CSF p-tau/A $\beta$ 42 |                 |                    |
|--------------------------------|-------------------------------|----------|--------------------|----------------------|-----------------|--------------------|------------------------|-----------------|--------------------|
|                                | $\beta$                       | <i>p</i> | <i>p</i> for trend | $\beta$              | <i>p</i>        | <i>p</i> for trend | $\beta$                | <i>p</i>        | <i>p</i> for trend |
| All participants               |                               |          | 0.99               |                      |                 | <b>&lt;0.01</b>    |                        |                 | <b>&lt;0.01</b>    |
| Unfavorable lifestyle          | Reference                     | -        |                    | Reference            | -               |                    | Reference              | -               |                    |
| Intermediate lifestyle         | -2.6E-3                       | 0.15     |                    | -0.08                | 0.09            |                    | -0.00                  | 0.72            |                    |
| Favorable lifestyle            | 1.7E-3                        | 0.52     |                    | -0.24                | <b>&lt;0.01</b> |                    | -0.04                  | <b>&lt;0.01</b> |                    |
| APOE $\epsilon$ 4 carriers     |                               |          | 0.99               |                      |                 | <b>0.02</b>        |                        |                 | 0.15               |
| Unfavorable lifestyle          | Reference                     | -        |                    | Reference            | -               |                    | Reference              | -               |                    |
| Intermediate lifestyle         | 1.1E-3                        | 0.72     |                    | -0.23                | 0.07            |                    | -0.01                  | 0.71            |                    |
| Favorable lifestyle            | 7.4E-4                        | 0.86     |                    | -0.37                | <b>0.04</b>     |                    | -0.05                  | 0.11            |                    |
| APOE $\epsilon$ 4 non-carriers |                               |          | 0.85               |                      |                 | <b>&lt;0.01</b>    |                        |                 | <b>&lt;0.01</b>    |
| Unfavorable lifestyle          | Reference                     | -        |                    | Reference            | -               |                    | Reference              | -               |                    |
| Intermediate lifestyle         | -3.3E-3                       | 0.15     |                    | -0.06                | 0.24            |                    | -0.00                  | 0.89            |                    |
| Favorable lifestyle            | 1.2E-3                        | 0.72     |                    | -0.29                | <b>&lt;0.01</b> |                    | -0.04                  | <b>&lt;0.01</b> |                    |

**Supplementary Table 3. Association between lifestyle categories (defined by physical activity and social engagement) and CSF AD biomarkers**

|                        | CSF A $\beta$ 42 |          |                    | CSF tau   |                 |                    | CSF p-tau |                 |                    |
|------------------------|------------------|----------|--------------------|-----------|-----------------|--------------------|-----------|-----------------|--------------------|
|                        | $\beta$          | <i>p</i> | <i>p</i> for trend | $\beta$   | <i>p</i>        | <i>p</i> for trend | $\beta$   | <i>p</i>        | <i>p</i> for trend |
| All participants       |                  |          | 0.38               |           |                 | <b>&lt;0.01</b>    |           |                 | <b>&lt;0.01</b>    |
| Unfavorable lifestyle  | Reference        | -        |                    | Reference | -               |                    | Reference | -               |                    |
| Intermediate lifestyle | -0.0002          | 0.26     |                    | -0.0038   | 0.15            |                    | -0.0063   | <b>0.05</b>     |                    |
| Favorable lifestyle    | 0.0002           | 0.46     |                    | -0.0102   | <b>&lt;0.01</b> |                    | -0.0171   | <b>&lt;0.01</b> |                    |

**Supplementary Table 4. Interaction analysis between physical activity and social engagement.**

|                                                        | CSF A $\beta$ 42 |             | CSF tau |                 | CSF p-tau |                 |
|--------------------------------------------------------|------------------|-------------|---------|-----------------|-----------|-----------------|
|                                                        | B                | <i>p</i>    | $\beta$ | <i>p</i>        | $\beta$   | <i>p</i>        |
| Age                                                    | -0.0000          | 0.87        | 0.0008  | <b>&lt;0.01</b> | 0.0007    | <b>&lt;0.01</b> |
| Sex                                                    | 0.0001           | 0.34        | -0.0009 | 0.63            | -0.0019   | 0.46            |
| Education                                              | 0.0000           | 0.87        | -0.0001 | 0.74            | -0.0004   | 0.15            |
| APOE                                                   | -0.0004          | <b>0.04</b> | 0.0020  | 0.43            | 0.0069    | <b>0.03</b>     |
| Physical activity                                      | 0.0004           | 0.31        | 0.0019  | 0.71            | 0.0052    | 0.45            |
| Absence of social isolation                            | -0.0002          | 0.41        | -0.0028 | 0.31            | -0.0045   | 0.19            |
| Physical activity $\times$ Absence of social isolation | 0.0000           | 0.95        | -0.0078 | 0.17            | -0.0152   | 0.04            |

### Questionnaire used in the evaluation of healthy lifestyles

|                                                                      |                                                  |
|----------------------------------------------------------------------|--------------------------------------------------|
| <b>Smoking status</b>                                                |                                                  |
| Do you smoke?                                                        | Yes/No                                           |
| How many cigarettes do you smoke in one day?                         |                                                  |
| Do you quit smoke?                                                   | Yes/No                                           |
| <b>Alcohol consumption</b>                                           |                                                  |
| Do you drink alcohol?                                                | Yes/No                                           |
| How often do you drink?                                              | times/week                                       |
| What kind of alcohol do you drink? How much do you drink in one day? | Wine: g/day<br>Liquor: g/day<br>Beer: bottle/day |
| <b>Social engagement</b>                                             |                                                  |
| What is your marital status?                                         | Single/married/separated/divorced/widowed        |
| Do you live alone?                                                   | Yes/No                                           |
| Do you have intimate relationship with your relatives?               | Yes/No                                           |
| Do you have intimate friends who can support you?                    | Yes/No                                           |
| Do you have intimate relationship with your neighbors?               | Yes/No                                           |
| <b>Physical activity</b>                                             |                                                  |
| Do you have physical exercise regularly?                             | Yes/No                                           |
| What kind of physical exercise do you do?                            |                                                  |
| What is the frequency of your physical exercise?                     | times/week                                       |
